# Supplementary material for: ROS-Mediated Inhibition of S-nitrosoglutathione Reductase Contributes to the Activation of Anti-oxidative Mechanisms
Source: Front Plant Sci. 2016 Nov 10;7:1669. doi: 10.3389/fpls.2016.01669 (PMC5102900; doi:10.3389/fpls.2016.01669)
Supplement: Supplementary file 2 [file Table_2.xlsx]

## Sheet: Tabelle1
Table S2. Gene enrichment analysis of the differentially regulated genes in gsnor mutants compared to WT plants using VirtualPlant 1.3 platform
Microarray analysis to compare 4-week-old WT and gsnor mutant. ArrayExpress accession number E-MTAB-4756
Gene Ontology Molecular Function
Upregulated genes		Observed frequency	Fisher Exact Test
	Term	%	p-value	Genes
GO:0003824	catalytic activity	47.6	5.72e-08	AT1G73860|AT1G74000|AT3G57510|AT2G19440|AT3G02230|AT5G20250|AT1G17540|AT5G05340|AT5G44630|AT2G19190|AT3G14990|AT1G13700|AT1G51850|AT1G54560|AT3G45920|AT1G51790|AT2G42980|AT1G10770|AT1G11190|AT1G28660|AT1G70080|AT1G44130|AT5G48430|AT1G74590|AT4G33360|AT2G19800|AT4G08770|AT1G14420|AT1G29630|AT2G23900|AT5G06940|AT3G48900|AT2G47040|AT2G30770|AT2G28630|AT1G76470|AT1G48260|AT3G04290|AT2G36190|AT2G25940…
GO:0004091	carboxylesterase activity	4.2	3.74e-07	AT4G30140|AT5G46940|AT5G50030|AT1G54000|AT5G40990|AT1G53990|AT1G28660|AT1G75790|AT1G23350|AT3G47380|AT2G47050|AT2G26450|AT2G31100|AT3G62170|AT1G75930|AT2G47040|AT4G02250|AT2G24560|AT4G24640|AT4G18970|AT5G07430|AT2G47550|AT3G04290|AT1G02810|AT5G47500|AT5G23530|AT1G58430|AT1G75920|AT2G42990|AT5G15720|AT5G45670|AT2G45220|AT5G45960|AT2G23620|AT1G53830|AT5G33370|AT1G13700|AT3G05610|AT4G02330|AT1G54010…
GO:0004553	hydrolase activity, hydrolyzing O-glycosyl compounds	5	3.74e-07	AT2G43870|AT3G60140|AT3G07850|AT3G48580|AT3G13790|AT4G14130|AT4G18990|AT3G62710|AT2G44450|AT3G15720|AT5G47000|AT1G75940|AT4G14080|AT3G14040|AT1G02310|AT5G48140|AT3G07820|AT2G43620|AT3G57510|AT2G16730|AT2G19440|AT3G26140|AT2G36190|AT4G35010|AT5G20250|AT3G23730|AT3G60120|AT1G71380|AT4G02290|AT1G61810|AT3G60130|AT3G09260|AT1G10640|AT2G14620|AT4G39010|AT2G43610|AT5G20390|AT3G23770|AT1G02850|AT5G14650…
GO:0016798	hydrolase activity, acting on glycosyl bonds	5.2	3.74e-07	AT2G43870|AT3G60140|AT3G07850|AT3G48580|AT3G13790|AT4G14130|AT4G18990|AT3G62710|AT2G44450|AT3G15720|AT5G47000|AT1G75940|AT4G14080|AT3G14040|AT1G02310|AT5G48140|AT3G07820|AT3G25050|AT2G43620|AT3G57510|AT2G16730|AT2G19440|AT3G26140|AT2G36190|AT4G35010|AT5G20250|AT3G23730|AT3G60120|AT4G03210|AT1G71380|AT4G02290|AT1G61810|AT3G60130|AT3G09260|AT1G10640|AT2G14620|AT4G39010|AT2G43610|AT5G20390|AT3G23770…
GO:0008289	lipid binding	3.3	6.53e-07	AT1G05020|AT1G66850|AT4G12470|AT5G59310|AT4G12480|AT5G57240|AT5G59320|AT3G54800|AT4G14815|AT3G08770|AT5G07540|AT5G07550|AT4G12500|AT5G62080|AT3G22600|AT5G01870|AT2G38530|AT5G07530|AT2G13820|AT5G59330|AT3G22620|AT5G48490|AT3G21260|AT5G64080|AT2G10940|AT5G07510|AT5G07230|AT4G12490|AT1G55260|AT5G52160|AT4G39670|AT5G07560|AT3G07450|AT5G44610|AT4G22470|AT3G51590
GO:0016787	hydrolase activity	19.6	1.07e-06	AT5G58050|AT2G39350|AT3G13790|AT5G61070|AT1G73860|AT4G14130|AT2G26450|AT2G44450|AT3G15720|AT4G02250|AT4G17480|AT1G25510|AT1G02310|AT5G48140|AT2G43620|AT3G57510|AT2G19440|AT3G28510|AT1G44900|AT3G16120|AT5G20250|AT2G42990|AT5G15720|AT5G64240|AT1G25230|AT4G02290|AT4G21590|AT2G43610|AT4G02060|AT1G13700|AT3G22910|AT5G24820|AT2G47030|AT1G54560|AT5G56870|AT4G11170|AT4G08870|AT5G20740|AT1G02360|AT2G42980…
GO:0004857	enzyme inhibitor activity	2.4	2.1e-05	AT2G02100|AT5G46940|AT5G06860|AT5G50030|AT2G45220|AT2G38870|AT1G17860|AT1G23350|AT3G47380|AT5G43580|AT1G72290|AT2G47050|AT2G43520|AT2G26450|AT3G62170|AT3G05610|AT2G47040|AT4G02250|AT4G24640|AT2G31980|AT2G47030|AT2G02140|AT2G47550|AT1G02810|AT5G20740|AT1G03710|AT1G10770
GO:0004364	glutathione transferase activity	1.4	4.71e-05	AT2G29480|AT1G74590|AT2G02390|AT1G17180|AT1G17170|AT2G29470|AT1G69930|AT2G29490|AT1G69920|AT2G29420|AT1G59670|AT1G02940|AT2G29440|AT3G09270|AT2G29460
GO:0016491	oxidoreductase activity	10.9	4.71e-05	AT1G72680|AT5G15180|AT1G32780|AT4G37370|AT1G14130|AT3G09220|AT1G26380|AT1G26390|AT5G21105|AT3G21420|AT5G20550|AT3G26830|AT4G21490|AT5G05340|AT5G06720|AT3G59890|AT5G19890|AT5G24900|AT3G11050|AT4G18350|AT3G13390|AT1G01600|AT2G45570|AT5G51480|AT1G26420|AT1G13140|AT1G01280|AT3G03670|AT3G55970|AT2G29350|AT4G37990|AT2G41540|AT1G63710|AT3G04000|AT1G04580|AT5G64120|AT2G30840|AT3G29250|AT1G11770|AT5G24910…
GO:0030599	pectinesterase activity	2.1	4.73e-05	AT5G46940|AT5G50030|AT2G45220|AT1G75790|AT1G23350|AT3G47380|AT1G53830|AT2G47050|AT2G26450|AT3G62170|AT3G05610|AT4G02330|AT2G47040|AT4G02250|AT4G24640|AT2G47030|AT5G07430|AT2G47550|AT1G02810|AT1G69940|AT5G47500|AT5G20740|AT1G10770
GO:0030234	enzyme regulator activity	3.6	7.75e-05	AT4G37490|AT5G46940|AT5G50030|AT1G76310|AT2G38870|AT2G17620|AT1G17860|AT1G23350|AT3G47380|AT2G47050|AT2G26450|AT3G62170|AT2G47040|AT4G02250|AT4G24640|AT3G55660|AT2G02140|AT4G03100|AT1G20590|AT2G47550|AT1G02810|AT2G02100|AT1G07370|AT5G06860|AT2G45220|AT3G11520|AT1G44110|AT1G67810|AT5G43580|AT1G72290|AT2G43520|AT3G05610|AT1G15570|AT2G31980|AT2G47030|AT5G06150|AT5G05940|AT5G20740|AT1G10770|AT1G03710
GO:0003777	microtubule motor activity	1.3	0.00151	AT2G28620|AT5G02370|AT4G14330|AT1G59540|AT2G22610|AT3G19050|AT1G18370|AT5G23910|AT4G05190|AT4G21270|AT1G73860|AT5G60930|AT3G16120|AT3G23670
GO:0019825	oxygen binding	2.6	0.00195	AT4G36380|AT4G39480|AT3G28740|AT1G13150|AT5G57220|AT1G74550|AT1G63710|AT3G14610|AT2G30750|AT4G39950|AT4G37370|AT3G14680|AT3G26320|AT1G74540|AT5G24910|AT2G46950|AT3G52970|AT5G24900|AT2G30770|AT2G46960|AT1G01600|AT3G10570|AT2G45570|AT5G08250|AT3G14660|AT1G13140|AT1G01280|AT3G26830|AT2G14100
GO:0020037	heme binding	2.9	0.00512	AT3G28740|AT1G13150|AT5G64110|AT5G15180|AT3G14610|AT4G37370|AT5G24910|AT2G46950|AT4G33420|AT2G14100|AT1G44970|AT4G39480|AT5G39580|AT5G57220|AT5G06720|AT2G30750|AT4G39950|AT5G19890|AT3G14680|AT5G64100|AT3G26320|AT3G52970|AT5G24900|AT4G08770|AT2G46960|AT2G45570|AT1G14540|AT5G08250|AT4G16270|AT3G14660|AT1G13140|AT3G03670
GO:0003774	motor activity	1.4	0.00541	AT2G28620|AT5G02370|AT4G14330|AT1G59540|AT2G22610|AT3G19050|AT1G54560|AT1G18370|AT5G23910|AT4G05190|AT4G21270|AT1G73860|AT5G60930|AT3G16120|AT3G23670
GO:0009055	electron carrier activity	3.3	0.00611	AT3G28740|AT1G13150|AT3G14610|AT4G37370|AT1G11770|AT1G26380|AT5G24910|AT2G46950|AT1G26390|AT5G53870|AT1G28480|AT2G02850|AT2G14100|AT1G30730|AT2G44790|AT4G39480|AT5G57220|AT5G44380|AT1G30700|AT2G30750|AT1G30720|AT1G03850|AT4G39950|AT5G20230|AT3G14680|AT2G25060|AT3G26320|AT3G52970|AT5G24900|AT2G46960|AT2G45570|AT5G08250|AT5G25090|AT3G14660|AT1G26420|AT1G13140|AT4G31840
GO:0004601	peroxidase activity	1.4	0.01	AT4G08770|AT1G44970|AT5G47000|AT5G39580|AT5G05340|AT1G14540|AT4G33420|AT5G06720|AT5G64110|AT5G15180|AT4G16270|AT5G19890|AT5G64120|AT3G03670|AT5G64100|AT4G37520
GO:0010294	abscisic acid glucosyltransferase activity	0.5	0.01	AT4G34138|AT4G34131|AT2G31750|AT1G05530|AT1G05560
GO:0016684	oxidoreductase activity, acting on peroxide as acceptor	1.4	0.01	AT4G08770|AT1G44970|AT5G47000|AT5G39580|AT5G05340|AT1G14540|AT4G33420|AT5G06720|AT5G64110|AT5G15180|AT4G16270|AT5G19890|AT5G64120|AT3G03670|AT5G64100|AT4G37520
GO:0016762	xyloglucan:xyloglucosyl transferase activity	0.7	0.01	AT4G18990|AT3G23730|AT4G03210|AT4G14130|AT3G25050|AT4G37800|AT2G14620|AT3G48580
GO:0016765	transferase activity, transferring alkyl or aryl (other than methyl) groups	1.6	0.01	AT2G29480|AT1G74590|AT1G17170|AT2G29470|AT1G69930|AT2G29420|AT1G59670|AT2G29440|AT2G23800|AT3G09270|AT2G02390|AT1G17180|AT5G60510|AT2G29490|AT1G69920|AT1G02940|AT4G17190|AT2G29460
GO:0016788	hydrolase activity, acting on ester bonds	6.6	0.01	AT5G46940|AT5G58050|AT1G53990|AT3G48900|AT1G75790|AT1G23350|AT2G26450|AT2G47040|AT4G17480|AT4G02250|AT4G24640|AT5G24770|AT4G18970|AT5G07430|AT3G04290|AT5G47500|AT5G23530|AT1G58430|AT2G42990|AT5G15720|AT2G45220|AT5G39400|AT1G25230|AT4G37070|AT4G21590|AT5G45960|AT2G29380|AT2G23620|AT3G19310|AT1G13700|AT2G41250|AT3G05610|AT4G02330|AT1G54010|AT1G23240|AT2G47030|AT1G02660|AT1G69940|AT5G20740|AT1G10770…
GO:0008094	DNA-dependent ATPase activity	0.7	0.01	AT5G20850|AT5G46280|AT3G23890|AT1G44900|AT4G02060|AT3G22880|AT2G07690|AT2G16440
GO:0005506	iron ion binding	3.1	0.01	AT3G28740|AT1G13150|AT5G64110|AT5G15180|AT3G14610|AT4G37370|AT5G24910|AT2G46950|AT4G33420|AT2G14100|AT1G44970|AT4G39480|AT5G39580|AT5G57220|AT5G06720|AT2G30750|AT4G39950|AT5G19890|AT3G14680|AT5G64100|AT3G26320|AT3G11050|AT3G52970|AT5G24900|AT4G08770|AT2G46960|AT2G45570|AT1G14540|AT5G08250|AT4G16270|AT3G14660|AT1G13140|AT3G03670|AT3G55970
GO:0030414	peptidase inhibitor activity	0.8	0.01	AT2G38870|AT2G02100|AT1G17860|AT2G31980|AT5G43580|AT1G72290|AT2G43520|AT1G03710|AT2G02140
GO:0035251	UDP-glucosyltransferase activity	1.4	0.01	AT4G02280|AT2G43820|AT1G05620|AT2G36750|AT2G13680|AT3G02230|AT3G46660|AT2G31750|AT4G34138|AT4G34135|AT1G05530|AT3G46670|AT4G34131|AT1G05680|AT1G05560
GO:0061134	peptidase regulator activity	0.8	0.01	AT2G38870|AT2G02100|AT1G17860|AT2G31980|AT5G43580|AT1G72290|AT2G43520|AT1G03710|AT2G02140
GO:0046906	tetrapyrrole binding	2.9	0.02	AT3G28740|AT1G13150|AT5G64110|AT5G15180|AT3G14610|AT4G37370|AT5G24910|AT2G46950|AT4G33420|AT2G14100|AT1G44970|AT4G39480|AT5G39580|AT5G57220|AT5G06720|AT2G30750|AT4G39950|AT5G19890|AT3G14680|AT5G64100|AT3G26320|AT3G52970|AT5G24900|AT4G08770|AT2G46960|AT2G45570|AT1G14540|AT5G08250|AT4G16270|AT3G14660|AT1G13140|AT3G03670
GO:0004650	polygalacturonase activity	1.1	0.02	AT5G14650|AT2G43870|AT1G02790|AT3G07850|AT3G14040|AT5G48140|AT3G07820|AT3G57510|AT2G41850|AT1G10640|AT2G23900|AT3G15720
GO:0005507	copper ion binding	2.2	0.02	AT3G13400|AT2G44790|AT1G55560|AT5G20230|AT1G75790|AT3G09260|AT5G13490|AT2G25060|AT3G29250|AT3G16420|AT4G23670|AT3G13390|AT1G07610|AT5G53870|AT5G21105|AT1G79530|AT5G25090|AT4G22010|AT5G51480|AT2G36950|AT1G55570|AT2G02850|AT4G31840|AT2G01530
GO:0016209	antioxidant activity	1.6	0.02	AT1G44970|AT5G39580|AT5G05340|AT5G06720|AT5G64110|AT5G15180|AT5G19890|AT5G64120|AT5G64100|AT4G37520|AT4G08770|AT5G47000|AT1G14540|AT1G65970|AT4G33420|AT4G16270|AT1G60740|AT3G03670
GO:0016538	cyclin-dependent protein kinase regulator activity	0.7	0.02	AT4G37490|AT2G17620|AT1G20590|AT5G06150|AT1G15570|AT1G76310|AT3G11520|AT1G44110
GO:0016837	carbon-oxygen lyase activity, acting on polysaccharides	0.6	0.02	AT4G13210|AT5G15110|AT5G55720|AT1G14420|AT3G53190|AT3G01270|AT2G02720
GO:0030570	pectate lyase activity	0.6	0.02	AT4G13210|AT5G15110|AT5G55720|AT1G14420|AT3G53190|AT3G01270|AT2G02720
GO:0046910	pectinesterase inhibitor activity	0.8	0.03	AT4G02250|AT4G24640|AT5G46940|AT5G50030|AT1G23350|AT3G47380|AT5G20740|AT2G47050|AT1G10770
GO:0004190	aspartic-type endopeptidase activity	1	0.04	AT5G19100|AT1G25510|AT4G16563|AT5G24820|AT1G65240|AT5G19120|AT1G44130|AT3G54400|AT3G12700|AT5G48430|AT2G42980
GO:0008194	UDP-glycosyltransferase activity	2	0.04	AT3G53150|AT1G05620|AT1G70090|AT2G13680|AT3G06260|AT3G11340|AT4G34135|AT3G46670|AT1G05680|AT1G05560|AT4G02280|AT2G43820|AT3G46690|AT3G46700|AT2G36750|AT2G36780|AT3G02230|AT3G46660|AT2G31750|AT4G34138|AT1G05530|AT4G34131
GO:0045735	nutrient reservoir activity	0.9	0.04	AT4G14630|AT5G26700|AT5G38910|AT5G39180|AT5G38940|AT5G07560|AT5G07540|AT5G07510|AT3G05930|AT4G37070
GO:0070001	aspartic-type peptidase activity	1	0.04	AT5G19100|AT1G25510|AT4G16563|AT5G24820|AT1G65240|AT5G19120|AT1G44130|AT3G54400|AT3G12700|AT5G48430|AT2G42980
GO:0008061	chitin binding	0.4	0.04	AT2G43590|AT2G43620|AT2G43570|AT2G43610
GO:0016623	oxidoreductase activity, acting on the aldehyde or oxo group of donors, oxygen as acceptor	0.4	0.04	AT5G20630|AT1G04580|AT5G20960|AT5G39190
GO:0019887	protein kinase regulator activity	0.7	0.04	AT4G37490|AT2G17620|AT1G20590|AT5G06150|AT1G15570|AT1G76310|AT3G11520|AT1G44110
Downregulated genes		Observed frequency	Fisher Exact Test
	Term	%	p-value	Genes
GO:0001071	nucleic acid binding transcription factor activity	15.4	3.34e-08	AT3G17730|AT4G32280|AT4G25470|AT2G04038|AT2G44840|AT4G17880|AT1G14580|AT5G66300|AT1G31050|AT1G73870|AT5G67190|AT1G01250|AT1G19510|AT1G32640|AT2G02820|AT1G73830|AT3G60390|AT2G18350|AT4G35900|AT5G47640|AT5G65130|AT5G46830|AT2G46990|AT1G26790|AT5G67180|AT3G12820|AT5G51990|AT1G71030|AT5G25810|AT1G63030|AT3G05800|AT3G58070|AT3G61910|AT5G13730|AT5G10140|AT5G15160|AT5G06710|AT2G42200|AT2G26580|AT5G54470…
GO:0003700	sequence-specific DNA binding transcription factor activity	15.4	3.34e-08	AT3G17730|AT4G32280|AT4G25470|AT2G04038|AT2G44840|AT4G17880|AT1G14580|AT5G66300|AT1G31050|AT1G73870|AT5G67190|AT1G01250|AT1G19510|AT1G32640|AT2G02820|AT1G73830|AT3G60390|AT2G18350|AT4G35900|AT5G47640|AT5G65130|AT5G46830|AT2G46990|AT1G26790|AT5G67180|AT3G12820|AT5G51990|AT1G71030|AT5G25810|AT1G63030|AT3G05800|AT3G58070|AT3G61910|AT5G13730|AT5G10140|AT5G15160|AT5G06710|AT2G42200|AT2G26580|AT5G54470…
